# Supplementary material for: Transfer of Human Microbiome to Drosophila Gut Model
Source: MDPI journal article supplement (doi:10.3390/microorganisms10030553), 2022-03-03
Supplement: s1 [file s1]

**Table S1.** Primer Sequences of qRT-PCR used in this study

| Gene        | Primer sequences (5'→3')                         | Reference |
|-------------|--------------------------------------------------|-----------|
| <i>Sir2</i> | CCGTTACTGAGGAGGAGCTG;<br>GTAGATCGCACACGTCCTTG    | [1]       |
| <i>Srl</i>  | CTCTTGGAGTCCGAGATCCGCAA;<br>GGGACCGCGAGCTGATGGTT | [1]       |
| <i>InR</i>  | AACAGTGGCGGATTTCGGTT;<br>TACTCGGAGCATTGGAGGCAT   | [2]       |
| <i>Tor</i>  | GCTCAGAGGCGAGAGACAAG;<br>CCAGCTCACGGAGGATAAAG    | [3]       |
| <i>Rp49</i> | GACGCTTCAAGGGACAGTATCTG;<br>AAACGCGGTTCTGCATGA   | [4]       |

**Table S2.** qRT-PCR procedure setting

| Step          | Time  | Temperature |
|---------------|-------|-------------|
| Hot start     | 2 min | 95 °C       |
| PCR reaction  | 15 s  | 95 °C       |
|               | 25 s  | 55 °C       |
|               | 35 s  | 72 °C       |
| melting curve |       | 1 °C / s    |

**Figure S1.** Venn diagram of OUT level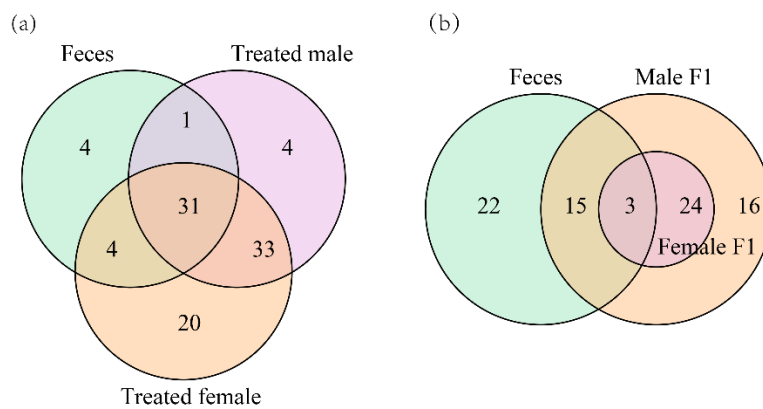**Table S3.** Fecal genera that uncolonized in drosophila

| Uncolonized fecal genera in treated male group   |         |         |
|--------------------------------------------------|---------|---------|
|                                                  | Feces   | Male    |
| <i>Veillonella</i>                               | 0.1550% | 0.0000% |
| <i>Bacteroides</i>                               | 0.1133% | 0.0000% |
| <i>Ruminococcaceae</i> UCG-013                   | 0.0817% | 0.0000% |
| <i>uncultured bacterium</i>                      | 0.0133% | 0.0000% |
| <i>Neisseria</i>                                 | 0.0017% | 0.0000% |
| Uncolonized fecal genera in treated female group |         |         |
| Species                                          | Feces   | Female  |
| <i>Clostridium sensu stricto 1</i>               | 0.0217% | 0.0000% |
| <i>Ruminococcaceae</i> UCG-013                   | 0.0817% | 0.0000% |

|                                       |          |           |
|---------------------------------------|----------|-----------|
| <i>Neisseria</i>                      | 0.0017%  | 0.0000%   |
| Uncolonized fecal genera in female F1 |          |           |
|                                       | Feces    | Female F1 |
| <i>Bifidobacterium</i>                | 76.9050% | 0.0000%   |
| <i>Other</i>                          | 14.0300% | 0.0000%   |
| <i>Lachnoclostridium</i>              | 3.2267%  | 0.0000%   |
| <i>Subdoligranulum</i>                | 0.6883%  | 0.0000%   |
| <i>Akkermansia</i>                    | 0.6650%  | 0.0000%   |
| <i>Escherichia-Shigella</i>           | 0.4083%  | 0.0000%   |
| <i>uncultured bacterium</i>           | 0.3083%  | 0.0000%   |
| <i>Veillonella</i>                    | 0.1550%  | 0.0000%   |
| <i>Bacteroides</i>                    | 0.1133%  | 0.0000%   |
| <i>Peptoclostridium</i>               | 0.1100%  | 0.0000%   |
| <i>Intestinibacter</i>                | 0.1017%  | 0.0000%   |
| <i>Ruminococcaceae UCG-013</i>        | 0.0817%  | 0.0000%   |
| <i>Eggerthella</i>                    | 0.0467%  | 0.0000%   |
| <i>Erysipelatoclostridium</i>         | 0.0267%  | 0.0000%   |
| <i>Clostridium sensu stricto 1</i>    | 0.0217%  | 0.0000%   |
| <i>uncultured bacterium</i>           | 0.0133%  | 0.0000%   |
| <i>Klebsiella</i>                     | 0.0117%  | 0.0000%   |
| <i>Proteus</i>                        | 0.0067%  | 0.0000%   |
| <i>Enterobacter</i>                   | 0.0050%  | 0.0000%   |
| <i>Neisseria</i>                      | 0.0017%  | 0.0000%   |
| Uncolonized fecal genera in male F1   |          |           |
|                                       | Feces    | Female F1 |
| <i>Escherichia-Shigella</i>           | 0.4083%  | 0.0000%   |
| <i>Veillonella</i>                    | 0.1550%  | 0.0000%   |
| <i>Peptoclostridium</i>               | 0.1100%  | 0.0000%   |
| <i>Intestinibacter</i>                | 0.1017%  | 0.0000%   |
| <i>Eggerthella</i>                    | 0.0467%  | 0.0000%   |
| <i>Erysipelatoclostridium</i>         | 0.0267%  | 0.0000%   |
| <i>uncultured bacterium</i>           | 0.0133%  | 0.0000%   |
| <i>Proteus</i>                        | 0.0067%  | 0.0000%   |
| <i>Neisseria</i>                      | 0.0017%  | 0.0000%   |

**Table S4.** The exposure of fecal microbes has enriched Male F1 with species that do not exist in the original intestinal bacteria of drosophila

| Species                            | Feces   | CK      | Male F1 |
|------------------------------------|---------|---------|---------|
| <i>Subdoligranulum</i>             | 0.6883% | 0.0000% | 0.0033% |
| <i>Akkermansia</i>                 | 0.6650% | 0.0000% | 0.0083% |
| <i>Bacteroides</i>                 | 0.1133% | 0.0000% | 0.0117% |
| <i>Ruminococcaceae UCG-013</i>     | 0.0817% | 0.0000% | 0.0067% |
| <i>Clostridium sensu stricto 1</i> | 0.0217% | 0.0000% | 0.0017% |
| <i>Klebsiella</i>                  | 0.0117% | 0.0000% | 0.0083% |
| <i>Enterobacter</i>                | 0.0050% | 0.0000% | 0.0033% |

**Table S5.** Adonis analysis on genus level in treated male drosophila

|           | Df | Sums Of Sqs | Mean Sqs | F.Model | R2      | Pr(>F) | Sig |
|-----------|----|-------------|----------|---------|---------|--------|-----|
| Group     | 1  | 2.9790      | 1.48949  | 6.4819  | 0.32439 | 0.001  | *** |
| Residuals | 27 | 6.2044      | 0.22979  | 0.67561 |         |        |     |
| Total     | 29 | 9.1834      | 1.00000  |         |         |        |     |

**Table S6.** Adonis analysis on genus level in treated female drosophila

|           | Df | Sums Of Sqs | Mean Sqs | F.Model | R2      | Pr(>F) | Sig |
|-----------|----|-------------|----------|---------|---------|--------|-----|
| Group     | 1  | 0.5969      | 0.59694  | 2.9681  | 0.10612 | 0.036  | *   |
| Residuals | 25 | 5.0280      | 0.20112  | 0.89388 |         |        |     |
| Total     | 26 | 5.6250      | 1.00000  |         |         |        |     |

**Table S7.** Relative abundance of intestinal bacterial phyla in male drosophila under the exposure of fecal microorganisms

| OTU ID         | Feces  | D10 CK | D20 CK | D30 CK | D10 Male Treated | D20 Male Treated | D30 Male Treated | Male F1 |
|----------------|--------|--------|--------|--------|------------------|------------------|------------------|---------|
| Actinobacteria | 76.95% | 0.01%  | 0.01%  | 0.00%  | 0.05%            | 0.12%            | 53.21%           | 0.02%   |
| Bacteroidetes  | 0.42%  | 0.00%  | 0.00%  | 0.01%  | 0.00%            | 0.01%            | 0.60%            | 0.04%   |
| Firmicutes     | 21.51% | 1.51%  | 0.32%  | 1.21%  | 15.10%           | 2.86%            | 31.27%           | 0.20%   |

**Table S8.** Shannon index of male drosophila group

|         | Feces | D10 CK | D20 CK | D30 CK | D10 Male Treated | D20 Male Treated | D30 Male Treated | Male F1 |
|---------|-------|--------|--------|--------|------------------|------------------|------------------|---------|
| shannon | 2.54  | 0.81   | 0.80   | 0.87   | 2.35             | 2.80             | 3.61             | 1.15    |

**Table S9.** Shannon index of female drosophila group

|         | Feces | D10 CK | D20 CK | D30 CK | D10 Female Treated | D20 Female Treated | D30 Female Treated | Female F1 |
|---------|-------|--------|--------|--------|--------------------|--------------------|--------------------|-----------|
| shannon | 2.54  | 1.29   | 1.26   | 1.09   | 1.36               | 2.41               | 1.76               | 0.72      |

**Table S10.** Relative abundance of bacteria in fecal samples TOP 20 (male drosophila group)

[illegible]

|                                    |       |       |       |       |       |       |       |       |       |       |
|------------------------------------|-------|-------|-------|-------|-------|-------|-------|-------|-------|-------|
| <i>Intestinibacter</i>             | 0.00% | 0.00% | 0.10% | 0.00% | 0.00% | 0.00% | 0.00% | 0.00% | 0.31% | 0.00% |
| <i>Ruminococcaceae UCG-013</i>     | 0.00% | 0.00% | 0.08% | 0.00% | 0.00% | 0.00% | 0.00% | 0.00% | 0.00% | 0.01% |
| <i>Eggerthella</i>                 | 0.00% | 0.00% | 0.05% | 0.00% | 0.00% | 0.00% | 0.00% | 0.00% | 0.05% | 0.00% |
| <i>Erysipelatoclostridium</i>      | 0.00% | 0.03% | 0.03% | 0.00% | 0.00% | 0.00% | 0.00% | 0.00% | 0.02% | 0.00% |
| <i>Clostridium sensu stricto 1</i> | 0.00% | 0.02% | 0.02% | 0.00% | 0.00% | 0.00% | 0.00% | 0.00% | 0.00% | 0.00% |
| <i>uncultured bacterium</i>        | 0.00% | 0.00% | 0.01% | 0.00% | 0.00% | 0.00% | 0.00% | 0.00% | 0.01% | 0.00% |
| <i>Klebsiella</i>                  | 0.00% | 0.00% | 0.01% | 0.00% | 0.00% | 0.00% | 0.00% | 0.00% | 0.09% | 0.01% |

**Table S11.** Relative abundance of bacteria in fecal samples TOP 20 (female drosophila group)

| OTU ID                             | D0     | Abx   | Feces  | D10 CK | D20 CK | D30 CK | D10 Female Treated | D20 Female Treated | D30 Female Treated | Female F1 |
|------------------------------------|--------|-------|--------|--------|--------|--------|--------------------|--------------------|--------------------|-----------|
| <i>Bifidobacterium</i>             | 0.00%  | 0.01% | 76.91% | 0.05%  | 0.01%  | 0.00%  | 0.71%              | 5.91%              | 17.57%             | 0.00%     |
| <i>Other</i>                       | 0.02%  | 0.79% | 14.03% | 0.00%  | 0.00%  | 0.00%  | 0.02%              | 0.13%              | 0.12%              | 0.00%     |
| <i>Lachnoclostridium</i>           | 0.06%  | 2.74% | 3.23%  | 0.00%  | 0.00%  | 0.00%  | 0.03%              | 0.35%              | 0.44%              | 0.00%     |
| <i>Enterococcus</i>                | 13.06% | 0.08% | 2.63%  | 0.14%  | 0.79%  | 0.95%  | 1.68%              | 0.21%              | 0.43%              | 0.00%     |
| <i>Subdoligranulum</i>             | 0.00%  | 0.00% | 0.69%  | 0.00%  | 0.00%  | 0.00%  | 0.00%              | 0.00%              | 0.01%              | 0.00%     |
| <i>Akkermansia</i>                 | 0.00%  | 0.00% | 0.67%  | 0.00%  | 0.00%  | 0.00%  | 0.03%              | 0.00%              | 0.01%              | 0.00%     |
| <i>Escherichia-Shigella</i>        | 0.01%  | 0.33% | 0.41%  | 0.00%  | 0.00%  | 0.00%  | 0.00%              | 0.09%              | 3.47%              | 0.00%     |
| <i>uncultured bacterium</i>        | 0.00%  | 0.03% | 0.31%  | 0.00%  | 0.00%  | 0.00%  | 0.00%              | 0.03%              | 0.03%              | 0.00%     |
| <i>Streptococcus</i>               | 0.01%  | 0.23% | 0.31%  | 0.02%  | 0.01%  | 0.00%  | 0.00%              | 0.04%              | 0.05%              | 0.00%     |
| <i>Veillonella</i>                 | 0.00%  | 0.00% | 0.16%  | 0.00%  | 0.00%  | 0.00%  | 0.00%              | 0.00%              | 0.00%              | 0.00%     |
| <i>Lactobacillus</i>               | 3.28%  | 1.27% | 0.13%  | 14.95% | 0.76%  | 0.32%  | 7.10%              | 20.81%             | 76.20%             | 0.03%     |
| <i>Bacteroides</i>                 | 0.00%  | 0.16% | 0.11%  | 0.01%  | 0.00%  | 0.00%  | 0.00%              | 0.00%              | 0.00%              | 0.00%     |
| <i>Peptoclostridium</i>            | 0.00%  | 0.00% | 0.11%  | 0.00%  | 0.00%  | 0.00%  | 0.01%              | 0.11%              | 0.30%              | 0.00%     |
| <i>Intestinibacter</i>             | 0.00%  | 0.01% | 0.10%  | 0.00%  | 0.00%  | 0.00%  | 0.01%              | 0.10%              | 0.39%              | 0.00%     |
| <i>Ruminococcaceae UCG-013</i>     | 0.00%  | 0.03% | 0.08%  | 0.00%  | 0.00%  | 0.00%  | 0.00%              | 0.00%              | 0.00%              | 0.00%     |
| <i>Eggerthella</i>                 | 0.00%  | 0.00% | 0.05%  | 0.00%  | 0.00%  | 0.00%  | 0.00%              | 0.01%              | 0.04%              | 0.00%     |
| <i>Erysipelatoclostridium</i>      | 0.00%  | 0.13% | 0.03%  | 0.00%  | 0.00%  | 0.00%  | 0.00%              | 0.01%              | 0.03%              | 0.00%     |
| <i>Clostridium sensu stricto 1</i> | 0.00%  | 0.01% | 0.02%  | 0.00%  | 0.00%  | 0.00%  | 0.00%              | 0.07%              | 0.01%              | 0.00%     |
| <i>uncultured bacterium</i>        | 0.00%  | 0.00% | 0.01%  | 0.00%  | 0.00%  | 0.00%  | 0.00%              | 0.00%              | 0.00%              | 0.00%     |
| <i>Klebsiella</i>                  | 0.01%  | 0.00% | 0.01%  | 0.00%  | 0.00%  | 0.00%  | 0.00%              | 0.00%              | 0.00%              | 0.00%     |

## Reference

1. Tinkerhess, M.J.; Healy, L.; Morgan, M.; Sujkowski, A.; Matthys, E.; Zheng, L.; Wessells, R.J., The *Drosophila* PGC-1 $\alpha$  homolog spargel modulates the physiological effects of endurance exercise. *PLoS ONE* **2012**, 7 (2), e31633.
2. Obata, F.; Fons, C.O.; Gould, A.P., Early-life exposure to low-dose oxidants can increase longevity via microbiome remodeling in *Drosophila*. *Nature Communications* **2018**, 9 (1), 975.
3. Boyd, O.; Weng, P.; Sun, X.; Alberico, T.; Laslo, M.; Obenland, D.M.; Kern, B.; Zou, S., Nectarine promotes longevity in *Drosophila melanogaster*. *Free Radical Biology and Medicine* **2011**, 50 (11), 1669-1678.
4. Storelli, G.; Defaye, A.; Erkosar, B.; Hols, P.; Royet, J.; Leulier, F., Lactobacillus plantarum promotes *Drosophila* systemic growth by modulating hormonal signals through TOR-dependent nutrient sensing. *Cell Metabolism* **2011**, 14 (3), 403-414.
